# Supplementary material
Source: HighWire-hosted journal article supplement (https://rc.rcjournal.com/highwire/filestream/23978/field_highwire_adjunct_files/3/rc-09925-File004.docx)
Supplement: rc-09925-File004.docx [file rc-09925-File004.docx]

**Table SM4.** Non-COVID-19 subjects characteristics based on WIND classification.

|  | Group 0  (n=40) | Group 1  (n=26) | Group 2  (n=8) | Group 3  (n=15) |
| --- | --- | --- | --- | --- |
| Age (years). * | 71.5 [54.5-76.5] | 60.5 [50.3-71.8] | 73.5 [66.3-79.8] | 74.0 [56.5-80.0] |
| Gender (Male), n (%) | 23 (57.5) | 13 (50.0) | 4 (50.0) | 10 (66.7) |
| Charlson Comorbidity Index (points). * | 3 [2-6] | 5 [2-8] | 4 [3-4] | 4 [2-5] |
| SAPS II at ICU admission (points). * | 51[40-64] | 33 [29-47] | 59 [44.5-65.5] | 44 [37.3-52.5] |
| SOFA day 1 of VM (points). * | 6.50 [3-10] | 5 [3-7.5] | 9.50 [7.25-11] | 6 [5.5-7.5] |
| PaO2/FiO2 day 1 of MV, Median [IQR]. * | 236 [153-299] | 253 [206-371] | 232 [189-309] | 272 [242-376] |
| Prone positioning sessions per patient, (n). * | 1 [1-2] | - | 1 [1-1] | 2 [1.5-2.5] |
| **Outcomes, n (%)** |  |  |  |  |
| Intubation to first separation attempt (days). * | - | 3 [2-6] | 6 [4.5- 9.5] | 2 [1-13] |
| Mechanical ventilation duration (days). * | 4 [2.75-10] | 3 [2- 6] | 11 [9-12.8] | 25 [12-28] |
| ICU length of stay. * | 5.5 [3-10.5] | 9 [5-16] | 14 [13.3-17] | 22 [14-31] |
| Extubation failure/extubation | 0/0 (0) | 1/23 (4.3) | 3/7 (42.8) | 10/10 (100.0) |
| Tracheostomy | 3 (7.5) | 3 (11.5) | 1 (12.5) | 8 (53.3%) |
| Status at ICU discharge (or Day 28) | |  |  |  |
| Alive | - | 22 (84.7%) | 4 (50.0) | 6 (29.2%) |
| Dead | 38 (95.0) | 2 (7.7%) | 4 (50.0) | 8 (65.2%) |
| Remainl in ICU | - | 1 (3.8%) | - | 1 (1.1%) |
| Discharge to other health facility | 2 (5.0%) | 1 (3.8%) | - | 4 (4.5%) |

ICU: intensive care unit; SAPS: Simplified Acute Physiology Score; SOFA: Sequential Organ Failure Assessment score.* Median [IQR]
